# Supplementary material for: The Role of Melatonin on NLRP3 Inflammasome Activation in Diseases
Source: MDPI journal article supplement (doi:10.3390/antiox10071020), 2021-06-24
Supplement: s1 [file s1]

**Supplementary Table S1.** *In vivo* studies of Melatonin involving NLRP3.

| Organism               | Model | Melatonin (MLT) Administration                       | Inflammasome Parameters Studied                                    | Findings about Melatonin                    | Mechanism of Inflammasome Suppression                                                                                                                                                                                                                 | Reference                                                                                                |
|------------------------|-------|------------------------------------------------------|--------------------------------------------------------------------|---------------------------------------------|-------------------------------------------------------------------------------------------------------------------------------------------------------------------------------------------------------------------------------------------------------|----------------------------------------------------------------------------------------------------------|
| Central Nervous System | Mouse | Subarachnoid hemorrhage (SAH) via surgery            | 150 mg/kg, IP, 2 h post-surgery                                    | NLRP3, ASC, caspase-12, IL-1 $\beta$        | Improves neuron and brain health; attenuates protein levels of NLRP3, ASC, caspase-1, IL-1 $\beta$ , IL-6, Bim; increases expression of Bcl2 in brain tissue of SAH mice.                                                                             | N/A [78]                                                                                                 |
|                        | Rat   | SAH via surgery                                      | 150 mg/kg, IP, 2 h after SAH                                       | NLRP3, ASC, caspase-1                       | Upregulates mitophagy and autophagy proteins; suppresses ROS generation and NLRP3 activation in brain tissue of SAH mice.                                                                                                                             | Autophagy/mitophagy [77]                                                                                 |
|                        | Rat   | Spinal cord injury (SCI)                             | 12.5 mg/kg/day, IP, for 10 consecutive days after SCI              | NLRP3, caspase-1, IL-1 $\beta$              | Improves locomotion functions; restores neuron numbers; suppresses NLRP3, caspase-1 and IL-1 $\beta$ protein levels in spinal cord.                                                                                                                   | N/A [176]                                                                                                |
|                        | Mouse | LPS-induced depressive like behavior (DLB)           | 500 mg/kg, IP, 4 doses with 6 h intervals, starting 2 h before LPS | NLRP3, caspase-1, IL-18, IL-1 $\beta$       | Ameliorates DLB; decreases NLRP3, caspase-1, IL-18, IL-1 $\beta$ protein levels and active microglia in mouse hippocampi.                                                                                                                             | N/A [64]                                                                                                 |
|                        | Rat   | Controlled cortical impact (CCI) injury on rat brain | 20 mg/kg, IP, 1 h before CCI                                       | NLRP3, IL-1 $\beta$                         | Suppresses NLRP3 activation, necroptosis, NF- $\kappa$ B activity, RAGE, IL-1 $\beta$ and IL-18 levels; prevents nuclear export of HMGB1 in brains of CCI rats.                                                                                       | A20/TNFAIP3-mediated necroptosis inhibition, inhibition of HMGB1 release, NF- $\kappa$ B inhibition [82] |
|                        | Rat   | SCI                                                  | 10 mg/kg neck injection (SC) after SCI, every 12 h until 72 h      | NLRP3, ASC, caspase-1, IL-1 $\beta$ , IL-18 | Decreases the loss in locomotor activity; reduces mRNA expression of NLRP3, caspase-1, TLR4, NF- $\kappa$ B, NOX2, TXNIP; reverses the rise in protein levels of NLRP1, AIM2, ASC, caspase-1, IL-1 $\beta$ , IL-18 in spinal cord tissue of SCI rats. | Downregulation of TXNIP and NF- $\kappa$ B expression [81]                                               |
|                        | Mouse | SAH via surgery                                      | 50-300 mg/kg IP injection, 15 min after SAH induction              | NLRP3, caspase-1, IL-1 $\beta$              | Reverses loss of neurological function and myelin basic protein content; reverses the rise in NLRP3, caspase-1, IL-1 $\beta$ protein levels; reduces accumulation of amyloid precursor protein in brains of SAH mice.                                 | N/A [76]                                                                                                 |

|        |       |                                                                                         |                                                                                                      |                                             |                                                                                                                                                                                                                                                                                                       |                                                                                 |      |
|--------|-------|-----------------------------------------------------------------------------------------|------------------------------------------------------------------------------------------------------|---------------------------------------------|-------------------------------------------------------------------------------------------------------------------------------------------------------------------------------------------------------------------------------------------------------------------------------------------------------|---------------------------------------------------------------------------------|------|
| Sepsis | Rat   | SCI                                                                                     | 10 mg/kg SC injection, every 12 h for 72 h post-SCI                                                  | NLRP3, ASC, caspase-1, IL-1 $\beta$ , IL-18 | Ameliorates locomotor activity; reverses the rising mRNA and protein levels of NLRP3, ASC and caspase-1; reverses the rise in secreted IL-1 $\beta$ and IL-18 in spinal cord tissue of SCI rats (effects are vertebra-dependent).                                                                     | N/A                                                                             | [80] |
|        | Mouse | Hot-plate, tail-flick, acetic acid pain tests on morphine-treated mice                  | 0.5 mg/kg IP injection 30 min before morphine, daily for 7 days                                      | NLRP3, ASC, caspase-1, IL-1 $\beta$         | Inhibits analgesic tolerance to morphine; reverses the rise in NLRP3, ASC, IL-1 $\beta$ , caspase-1, Cathepsin B expression in brains; reverses the rise in IL-1 $\beta$ levels in serum of morphine-treated mice. (NLRP3 <sup>-/-</sup> mice are more resistant to both pain and morphine tolerance) | N/A                                                                             | [85] |
|        | Mouse | Sepsis via Cecal ligation and puncture (CLP) on wildtype and ROR $\alpha$ knockout mice | 30 mg/kg in 3 or 4 doses: 1 intraperitoneal (IP) dose pre-, 2-3 subcutaneous (SC) doses post-surgery | NLRP3, IL-1 $\beta$                         | Disrupts NF-kB deacetylation; suppresses NLRP3 activation in heart tissue of septic mice.                                                                                                                                                                                                             | ROR $\alpha$ and SIRT1 dependent NF-kB inhibition (deacetylation)               | [59] |
|        | Mouse | Sepsis via CLP                                                                          | 30 mg/kg in 3 doses: 1 IP dose pre-, 2 SC doses post-surgery                                         | NLRP3, ASC, caspase-1                       | Blunts sepsis-induced NLRP3 activation in heart tissue of septic mice.                                                                                                                                                                                                                                | ROR $\alpha$ , Clock/Bmal1 and SIRT1 dependent NF-kB inhibition (deacetylation) | [89] |
|        | Mouse | Sepsis via CLP                                                                          | 30 mg/kg in 3 doses: 1 IP dose pre-, 2 SC doses post-surgery                                         | NLRP3, caspase-1, IL-1 $\beta$              | Improves cardiomyocyte morphology; lowers NLRP3, caspase-1, IL-1 $\beta$ protein levels and NF-kB nuclear translocation; increases Clock, Bmal1, Sirt1 and Nampt mRNA expression in heart tissue of septic mice.                                                                                      | NF-kB inhibition through Clock/Bmal1/Sirt1 pathway                              | [88] |
|        | Rat   | Sepsis via CLP                                                                          | 150 mg/kg in 3 doses: 1 IP dose pre-, 2 SC doses post-surgery                                        | NLRP3, ASC, caspase-1, IL-1 $\beta$ , IL-18 | Reverses tissue damage, the reduction in SOD2, and the rise in NLRP3, caspase-1, PINK1, IL-18, IL-1 $\beta$ , IL-6 protein levels in kidneys of septic rats.                                                                                                                                          | ROS downregulation                                                              | [91] |

|                                       |       |                                                                   |                                                              |                                                    |                                                                                                                                                                                                                                                                                                                                                                                                                           |                                                                       |       |
|---------------------------------------|-------|-------------------------------------------------------------------|--------------------------------------------------------------|----------------------------------------------------|---------------------------------------------------------------------------------------------------------------------------------------------------------------------------------------------------------------------------------------------------------------------------------------------------------------------------------------------------------------------------------------------------------------------------|-----------------------------------------------------------------------|-------|
| Cardiovascular and Metabolic Diseases | Mouse | Sepsis via CLP on WT and NLRP3 <sup>-/-</sup> mice                | 30 mg/kg in 3 doses: 1 IP dose pre-, 2 SC doses post-surgery | NLRP3 (no MLT-NLRP3 interaction studied)           | Promotes Nrf2 expression and nuclear translocation; improves mitochondrial respiration rates; reverses the pro-apoptotic profile of cells (as measured by Bax, Bcl2, p53 and caspases); suppresses the rise in autophagy and mitophagy associated proteins in heart tissues of septic mice.<br><br>Effects on oxidative stress protection enzymes are variable. Effects are less pronounced in NLRP3 <sup>-/-</sup> mice. | N/A                                                                   | [90]  |
|                                       | Mouse | IP LPS-challenge; Diet-induced obesity                            | 20 mg/kg/day, IP, for 14 days after LPS or in obese mice     | NLRP3, ASC, caspase-1, IL-1 $\beta$ , GSDMD        | Reduces serum IL-1 $\beta$ , white adipose tissue mRNA and protein expression of NLRP3, ASC, pro-caspase-1, GSDMD in obese, LPS-challenged, or vehicle mice.                                                                                                                                                                                                                                                              | NF- $\kappa$ B inhibition                                             | [104] |
|                                       | Mouse | High fat diet-induced atherosclerosis in ApoE <sup>-/-</sup> mice | 10 mg/kg/day, via gastric gavage, for 12 weeks               | NLRP3, ASC, caspase-1, IL-1 $\beta$ , IL-18, GSDMD | Alleviates atherosclerosis; reduces IL-1 $\beta$ and IL-18 levels in serum; downregulates NLRP3, ASC, caspase-1, IL-1 $\beta$ , IL-18, GSDMD mRNA and MEG3 lncRNA and restores miR-223 in mice aortas.                                                                                                                                                                                                                    | NF- $\kappa$ B inhibition, MEG3 decrease-induced miR-223 upregulation | [69]  |
|                                       | Mouse | High fat diet-induced atherosclerosis in ApoE <sup>-/-</sup> mice | 20 mg/kg/day, IP, for 28 days                                | NLRP3, ASC, caspase-1                              | Slows lesion progression; reduces NLRP3, caspase-1 and mature IL-1 $\beta$ protein levels; increases Sirt3 activity and mitophagy in atherosclerotic lesions; decreases IL-1 $\beta$ in serum.                                                                                                                                                                                                                            | Sirt3 activation, autophagy/mitophagy                                 | [95]  |
|                                       | Rat   | Smoke exposed rats                                                | 10 mg/kg/day, IP, for 2 weeks (coadministration)             | NLRP3, ASC, caspase-1, IL-1 $\beta$ , IL-18        | Reduces protein levels of NLRP3, ASC, caspase-1, IL-1 $\beta$ , IL-18; lowers ROS and malondialdehyde (MDA) production; reverses the fall in SOD in carotid arteries; decreases IL-1 $\beta$ and IL-18 in serum.                                                                                                                                                                                                          | ROS downregulation                                                    | [177] |

|                    |       |                                               |                                                                                       |                                                 |                                                                                                                                                                                                                                                                                   |                                                                                     |       |
|--------------------|-------|-----------------------------------------------|---------------------------------------------------------------------------------------|-------------------------------------------------|-----------------------------------------------------------------------------------------------------------------------------------------------------------------------------------------------------------------------------------------------------------------------------------|-------------------------------------------------------------------------------------|-------|
| Respiratory System | Mouse | Streptozotocin-induced diabetes mellitus (DM) | 10 mg/kg/day, via gastric gavage, for 8 weeks                                         | NLRP3, ASC, caspase-1, IL-1 $\beta$ , and IL-18 | Restores cardiac function; reduces fibrosis, collagen production and TGF- $\beta$ 1, p-Smad2, p-Smad3, NLRP3, ASC, caspase-1, IL-1 $\beta$ , IL-18 protein levels; reverses the rise in lncRNA MALAT1 and the decline in miR-141 in cardiac tissue of DM mice.                    | Upregulation of miR-141 (targets NLRP3), downregulation of MALAT1 (targets miR-141) | [66]  |
|                    | Mouse | Leptin deficient obese mice                   | 100 mg/kg/day, in drinking water, for 8 weeks                                         | NLRP3                                           | Restores AMPK, SIRT1, NRF2 activity; restores PGC-1 $\alpha$ , SIRT1, NRF2, HO-1 protein levels; reverses the rise in NLRP3, TNF- $\alpha$ , IL-6 protein levels and inflammatory leukocyte infiltration in hearts; decreases TNF- $\alpha$ , IL-6 levels in serum of obese mice. | AMPK/SIRT1/NRF2 activation                                                          | [105] |
|                    | Mouse | Streptozotocin-induced DM                     | 10 mg/kg/day, via gastric gavage for 8 weeks                                          | NLRP3, caspase-1, IL-1 $\beta$ , GSDMD          | Increases neuron numbers; reverses the rise in NLRP3, IL-1 $\beta$ , cleaved GSDMD and caspase-1; suppresses the rise in autophagy-associated proteins in brains of DM mice.                                                                                                      | N/A                                                                                 | [67]  |
|                    | Rat   | Aflatoxin B1 induced cardiotoxicity           | 5 mg/kg/day, via gastric gavage, for 6 weeks                                          | NLRP3, ASC, caspase-1, IL-1 $\beta$             | Restores SOD levels, reduces NLRP3, ASC, caspase-1, IL-1 $\beta$ protein levels, reverses the rise in NF-kB activation and ROS in myocardium of aflatoxin-treated rats.                                                                                                           | NF-kB inhibition, ROS downregulation                                                | [96]  |
|                    | Mouse | LPS-induced acute lung injury (ALI)           | 30 mg/kg, IP (1 dose before, 2 doses after ALI) or intratracheal (2 doses after ALI). | caspase-1, IL-1 $\beta$                         | Reduces lung damage; decreases leukocyte number, free histones, caspase-1 and IL-1 $\beta$ in bronchoalveolar lavage fluid (BALF).                                                                                                                                                | Inhibiting histone release (suggested)                                              | [118] |
|                    | Rat   | LPS and cigarette smoke induced COPD model    | 10 mg/kg/day, IP, for 28 days                                                         | NLRP3, ASC, caspase-1, IL-1 $\beta$             | Improves lung function; reduces IL-1 $\beta$ and inflammatory cells in BALF; decreases NLRP3, ASC, caspase-1 and increases SIRT1 protein levels in lung tissue. Anti-inflammasome effects are lost with SIRT1 inhibition.                                                         | SIRT1 upregulation                                                                  | [62]  |
|                    | Mouse | Radiation induced lung injury                 | 1 mg/day, IP, for 7 days post irradiation                                             | IL-1 $\beta$                                    | Protects against lung damage; restores levels of SOD in lung tissue; reverses IL-1 $\beta$ increase in BALF.                                                                                                                                                                      | N/A                                                                                 | [68]  |

|  |       |                                                                          |                                                        |                                             |                                                                                                                                                                                                                                                                                                                                                                                                                                                                                          |                                                                                      |       |
|--|-------|--------------------------------------------------------------------------|--------------------------------------------------------|---------------------------------------------|------------------------------------------------------------------------------------------------------------------------------------------------------------------------------------------------------------------------------------------------------------------------------------------------------------------------------------------------------------------------------------------------------------------------------------------------------------------------------------------|--------------------------------------------------------------------------------------|-------|
|  | Mouse | Ovalbumin induced airway inflammation                                    | 10 mg/kg, IP, 1 h before ovalbumin                     | NLRP3, caspase-1, IL-1 $\beta$ , IL-18      | Ameliorates airway inflammation, lowers leukocyte count and Th2-associated cytokines in BALF, reduces NLRP3 activation in lungs. CpG-ODNs suppress inflammation, and boost melatonin biosynthesis.                                                                                                                                                                                                                                                                                       | N/A                                                                                  | [121] |
|  | Mouse | Ovalbumin induced airway inflammation in WT and TLR2 <sup>-/-</sup> mice | 10 mg/kg, IP, 1 h before ovalbumin                     | NLRP3, caspase-1, IL-1 $\beta$ , IL-18      | Improves tissue morphology; reduces TLR2 expression, leukocyte infiltration and NLRP3 activation, and boosts melatonin synthesis in lungs. Airway inflammation decreases melatonin synthesis in lungs; lack of TLR2 receptors rescues this effect.                                                                                                                                                                                                                                       | TLR2 downregulation                                                                  | [120] |
|  | Mouse | Cigarette smoke induced COPD model                                       | 2.5-20 mg/kg IP injection 1 h before smoke for 4 weeks | NLRP3, caspase-1, IL-1 $\beta$ , IL-18      | Reverses cell damage, inflammatory cell number, alveolar deformation and MPO activity; reduces ROS, MDA and reverses the fall in antioxidant enzymes; returns mitochondrial membrane potential closer to normal; reduces expression of TNF- $\alpha$ , IL-1 $\beta$ , IL-18 in BALF; reverses the rise in levels of ER stress related proteins, TXNIP, NLRP3, caspase-1 and IL-1 $\beta$ ; raises levels of antioxidant and mitophagy-promoting proteins in lungs of smoke-exposed mice. | ROS downregulation, reduction of TXNIP levels (by reduction of ER stress), mitophagy | [119] |
|  | Mouse | Ovariectomy-induced osteoporosis                                         | 10 or 50 mg/kg/day, IP, for 8 weeks                    | NLRP3, ASC, caspase-1, IL-1 $\beta$ , IL-18 | Restores bone mineral density; improves osteogenic differentiation in bone marrow mesenchymal stem cells (BMSCs); decreases protein levels of NLRP3, ASC, caspase-1, IL-1 $\beta$ in femoral bone and BMSCs.                                                                                                                                                                                                                                                                             | Wnt/ $\beta$ -catenin pathway activation                                             | [150] |
|  | Rat   | Puncture-induced intervertebral disc degeneration (IVDD)                 | 30 mg/kg/week, IP, after surgery                       | NLRP3, ASC, caspase-1, IL-1 $\beta$         | Delays the progression of IVDD; suppresses NLRP3 inflammasome activation in vertebral tissue.                                                                                                                                                                                                                                                                                                                                                                                            | N/A                                                                                  | [144] |

|                          |       |                                    |                                                                                                                  |                                     |                                                                                                                                                                                                               |                                                                       |       |
|--------------------------|-------|------------------------------------|------------------------------------------------------------------------------------------------------------------|-------------------------------------|---------------------------------------------------------------------------------------------------------------------------------------------------------------------------------------------------------------|-----------------------------------------------------------------------|-------|
| Other Organs and Tissues | Rat   | Radiation-induced oral mucositis   | 45 mg/day, IP or oral gel, for 21 days                                                                           | NLRP3, ASC, caspase-1, IL-1 $\beta$ | Restores mitochondrial functionality; prevents apoptosis, NF-kB and NLRP3 activation in tongue tissue (when given as oral gel).                                                                               | NF-kB inhibition                                                      | [154] |
|                          | Mouse | Cadmium-induced liver injury       | 10 mg/kg/day, IP, for 3 days before Cadmium                                                                      | NLRP3, caspase-1, IL-1 $\beta$      | Decreases serum ALT/AST levels; attenuates hepatocyte death, NLRP3 activation, ROS and TXNIP expression in liver tissue.                                                                                      | Inhibition of TXNIP-NLRP3 interaction, ROS downregulation             | [60]  |
|                          | Rat   | Radiation induced intestine injury | 45 mg/day, oral application (gel), 2 days before the first irradiation, until 14 days after the last irradiation | NLRP3, caspase-1, IL-1 $\beta$      | Restores expression of mitochondrial proteins; suppresses NLRP3 activation, NF-kB expression and translocation, and apoptosis in rat small intestine.                                                         | NF-kB inhibition                                                      | [167] |
|                          | Mouse | LPS-induced endometritis           | 5, 10 or 20 mg/kg, IP, 1 h before LPS injection and 25 h before sacrifice                                        | NLRP3, ASC, caspase-1, IL-1 $\beta$ | Reduces myeloperoxidase (MPO) activity, NF-kB activation and ROS; reverses the increase in TXNIP, NLRP3, ASC, caspase-1, IL-1 $\beta$ and ER stress protein levels; increases AMPK activity in uterus tissue. | Suppression of TXNIP-NLRP3 interaction and ER stress, AMPK activation | [61]  |
|                          | Mouse | Pristane-induced Lupus Nephritis   | 10 mg/kg/day in drinking water, after pristane delivery, for 6 months                                            | NLRP3                               | Restores kidney morphology; reduces TNF- $\alpha$ , NF-kB, iNOS, NLRP3 protein levels and restores SIRT1, NRF2 protein levels in the kidney.                                                                  | SIRT1/NRF2 increase                                                   | [172] |

**Supplementary Table S2.** *In vitro* studies of Melatonin involving NLRP3

| Topic                                 | Cell Line                                   | Inflammasome Inducer                                               | Melatonin Administration                                    | Inflammasome Parameters Studied                    | Findings about Melatonin                                                                                                                                                                                                                                                      | Mechanism of Inflammasome Suppression                            | Reference |
|---------------------------------------|---------------------------------------------|--------------------------------------------------------------------|-------------------------------------------------------------|----------------------------------------------------|-------------------------------------------------------------------------------------------------------------------------------------------------------------------------------------------------------------------------------------------------------------------------------|------------------------------------------------------------------|-----------|
| Central Nervous System                | Human SH-SY5Y neuronal and U251 glial cells | LPS-induced NLRP3 activation                                       | 10 $\mu$ M, co-treatment                                    | NLRP3, caspase-1, IL-1 $\beta$                     | Suppresses NLRP3, IL-1 $\beta$ and caspase-1 protein and mRNA levels.                                                                                                                                                                                                         | N/A                                                              | [176]     |
|                                       | Mouse N9 microglia                          | LPS+ATP induced NLRP3 activation                                   | 500 $\mu$ M, 1 h pretreatment + co-treatment with LPS & ATP | NLRP3, ASC, caspase-1, IL-18, IL-1 $\beta$ , GSDMD | Decreases NLRP3, caspase-1 protein levels, ASC speck formation, IL-18 & IL-1 $\beta$ secretion, mtROS production, GSDMD cleavage, pyroptosis and NF-kB activation; increases SIRT1 and NRF2 activity<br>Anti-inflammasome effects are reversed with SIRT1 or NRF2 inhibition. | NF-kB inhibition, ROS downregulation, SIRT1/NRF2 activity        | [64]      |
|                                       | Mouse primary microglia                     | Inflammasome activation by morphine + nigericin or LPS + nigericin | 200 $\mu$ M for 30 min before LPS or morphine               | NLRP3, ASC, caspase-1, IL-1 $\beta$ , GSDMD        | Reverses the rise in ROS, protein levels of NLRP3, ASC, mature caspase-1 and IL-1 $\beta$ , Cathepsin B in morphine- or LPS-induced microglia.                                                                                                                                | ROS downregulation, inhibition of Cathepsin B release            | [85]      |
|                                       | Rat primary keratinocytes                   | High-glucose (HG) medium treatment                                 | 1 mM, 24 h pre-treatment                                    | NLRP3, ASC, caspase-1, IL-1 $\beta$                | Reduces mRNA and secreted levels of TNF- $\alpha$ , IL-1 $\beta$ , IL-6, IL-8; suppresses ROS, caspase-1 activity, apoptosis, expression of NLRP3 inflammasome components; restores SOD activity, cell proliferation.                                                         | ERK signaling                                                    | [1]       |
| Cardiovascular and Metabolic Diseases | Human Aortic Endothelial Cells (HAECs)      | ox-LDL treatment                                                   | 10 $\mu$ M for 48 h after ox-LDL                            | NLRP3, ASC, caspase-1, IL-1 $\beta$ , IL-18, GSDMD | Reverses the increase in MEG3 and decrease in miR-223; lowers protein levels of NLRP3, ASC, caspase-1, IL-1 $\beta$ , IL-18, GSDMD-N.                                                                                                                                         | MEG3 decrease-induced miR-223 upregulation                       | [69]      |
|                                       | Mouse RAW264.7 macrophages                  | ox-LDL treatment                                                   | 10 $\mu$ M for 24 h, co-treatment                           | NLRP3, ASC, caspase-1, IL-1 $\beta$                | Decreases NLRP3 inflammasome activation, IL-1 $\beta$ secretion and ROS production;                                                                                                                                                                                           | Sirt3/FOXO3a activation, Autophagy/mitophagy, ROS downregulation | [95]      |

|                        |                                                  |                                        |                             |                                             |                                                                                                                                                                                                                       |                                                                                     |       |
|------------------------|--------------------------------------------------|----------------------------------------|-----------------------------|---------------------------------------------|-----------------------------------------------------------------------------------------------------------------------------------------------------------------------------------------------------------------------|-------------------------------------------------------------------------------------|-------|
|                        |                                                  |                                        |                             |                                             | increases Sirt3 activity, FOXO3a deacetylation and mitophagy. Changes are reversed with Sirt3 knockdown.                                                                                                              |                                                                                     |       |
|                        | Mouse primary cardiac fibroblasts                | HG medium treatment                    | 10 $\mu$ M, 48 h            | NLRP3, ASC, caspase-1, IL-1 $\beta$ , IL-18 | Reduces collagen production and TGF- $\beta$ 1, p-Smad2, p-Smad3, NLRP3, ASC, caspase-1, IL-1 $\beta$ , IL-18 protein levels; reverses the rise in lncRNA MALAT1 and the decline in miR-14 in HG-treated fibroblasts. | Upregulation of miR-141 (targets NLRP3), downregulation of MALAT1 (targets miR-141) | [66]  |
|                        | Human SH-SY5Y neuronal cells                     | HG medium treatment                    | 10 $\mu$ M for 24 h         |                                             | Reduces cell death; reverses the rise in NLRP3, IL-1 $\beta$ , cleaved GSDMD and caspase-1; suppresses the rise in autophagy-associated proteins; reverses the fall in miR-214-3p (a caspase-1 targeting miRNA).      | miR-214-3p upregulation                                                             | [67]  |
| Respiratory System     | Human L-132 lung alveolar epithelium cells       | CSE administration                     | 0-50 $\mu$ M 1 h before CSE | NLRP3                                       | Increases cell viability, reduces toxic effects of CSE; reverses the rise in NLRP3 and TXNIP protein expression; reduces ROS levels in CSE-treated cells. (ROS inhibitor NAC increases effects further).              | TXNIP and ROS downregulation                                                        | [119] |
| Musculoskeletal Tissue | Rat primary nucleus pulposus cells               | TNF- $\alpha$ induced NLRP3 activation | 50-1000 nM, 1-24 h          | NLRP3, caspase-1, GSDMD                     | Suppresses NAMPT expression, TNF- $\alpha$ induced NLRP3 activity and matrix degradation (NAMPT expression induces NLRP3 activation).                                                                                 | Suppression of NAMPT/MAPK/NF-kB signalling                                          | [145] |
|                        | Human nucleus pulposus cells from intervertebral | IL-1 $\beta$ induced NLRP3 activation  | 1 mM, 24 h                  | NLRP3, ASC, caspase-1, IL-1 $\beta$         | Reverses IL-1 $\beta$ induced NLRP3 activation and rise in pro-IL-1 $\beta$ , pro-caspase-1, NLRP3                                                                                                                    | NF-kB inhibition, ROS downregulation                                                | [144] |



|                  |                                                 |                                                                           |                                                                                                                            |                                                    |                                                                                                                                                                                                                                        |                                                           |       |
|------------------|-------------------------------------------------|---------------------------------------------------------------------------|----------------------------------------------------------------------------------------------------------------------------|----------------------------------------------------|----------------------------------------------------------------------------------------------------------------------------------------------------------------------------------------------------------------------------------------|-----------------------------------------------------------|-------|
|                  | disc degeneration patients                      |                                                                           |                                                                                                                            |                                                    | mRNA; reduces NF- $\kappa$ B signaling and mtROS production.                                                                                                                                                                           |                                                           |       |
| Other Tissues    | Mouse primary hepatocytes                       | Cadmium-induced NLRP3 activation                                          | 1 mM, 2 h pre-treatment                                                                                                    | NLRP3, caspase-1, IL-1 $\beta$                     | Reduces cadmium-induced cell death, NLRP3 activation and TXNIP-NLRP3 interaction.                                                                                                                                                      | Inhibition of TXNIP-NLRP3 interaction, ROS downregulation | [60]  |
|                  | Mouse RAW 264.7 macrophages and BMDMs           | RAW 264.7: LPS<br>BMDMs: LPS priming + ATP or Nigericin                   | HIS, a MLT-derivative is used.<br>RAW: 40 $\mu$ M HIS or MLT, 1 h pre-treatment<br>BMDM: 40 $\mu$ M HIS, 1 h pre-treatment | NLRP3, ASC, caspase-1, IL-1 $\beta$                | HIS is more effective at reversing inflammatory changes than MLT at the same concentration in RAW264.7 cells. HIS inhibits caspase-1 and IL-1 $\beta$ secretion, but not inflammasome complex protein levels in LPS+ATP treated BMDMs. | Attenuation of STAT1 and IRF3 phosphorylation             | [178] |
|                  | Mouse primary peritoneal macrophages            | LPS and histone induced NLRP3 activation                                  | 0.1-5 mM, 30 min after 4 h LPS                                                                                             | caspase-1, IL-1 $\beta$                            | Suppresses IL-1 $\beta$ and caspase-1 release from cells dose-dependently; does not decrease mtROS.                                                                                                                                    | N/A                                                       | [118] |
| In Vitro General | Mouse primary adipocytes                        | LPS-induced NLRP3 activation                                              | 1 $\mu$ M for 14 h alone + 10 h with LPS                                                                                   | NLRP3, ASC, caspase-1, IL-1 $\beta$ , GSDMD        | Suppresses NF- $\kappa$ B activation, NLRP3 activation, GSDMD mRNA levels and pyroptosis.                                                                                                                                              | NF- $\kappa$ B inhibition                                 | [104] |
|                  | Mouse RAW 264.7 macrophages                     | Radiation-induced NLRP3 activation                                        | 500 $\mu$ M for 12 h after irradiation                                                                                     | NLRP3, ASC, caspase-1, IL-1 $\beta$ , IL-18        | Reduces NLRP3, ASC, IL-1 $\beta$ protein levels, ROS and pyroptosis; restores miR-30e expression.                                                                                                                                      | ROS downregulation, miR-30e (targeting NLRP3)             | [68]  |
|                  | Human umbilical vein endothelial cells (HUVECs) | Cigarette smoke extract (CSE)-induced NLRP3 activation                    | 100 $\mu$ M, 3 h pre-treatment + 24 h co-treatment                                                                         | NLRP3, ASC, caspase-1, IL-1 $\beta$ , IL-18, GSDMD | Reduces ROS production, cell death and protein levels of NLRP3, ASC, caspase-1, IL-1 $\beta$ , IL-18, GSDMD-N.                                                                                                                         | ROS downregulation                                        | [177] |
|                  | Mouse BV2 microglia and HT22 neuronal cells     | BV2: Thrombin-induced inflammation<br>HT22: Medium from induced BV2 cells | 2-100 $\mu$ M (effective dose = 20 $\mu$ M), 30 min pre-treatment                                                          | NLRP3, ASC, caspase-1, IL-1 $\beta$ , IL-18        | Reverses the rise in ROS and protein levels of NLRP3, ASC, IL-1 $\beta$ , IL-18 in thrombin-induced BV2 cells. (HT22 cells treated with thrombin + melatonin conditioned                                                               | ROS downregulation                                        | [175] |

---

medium is  
protected against  
ROS and  
apoptosis,  
compared to those  
treated with  
thrombin  
conditioned  
medium)

---
